# Supplementary material
Source: PubMed Central journal article supplement (PMC6662598)

Figure S1

Total number of subjects: 19

Average number of doses per subject: 7

Total/Average/Min/Max numbers of observations: 381 20.05 14 21

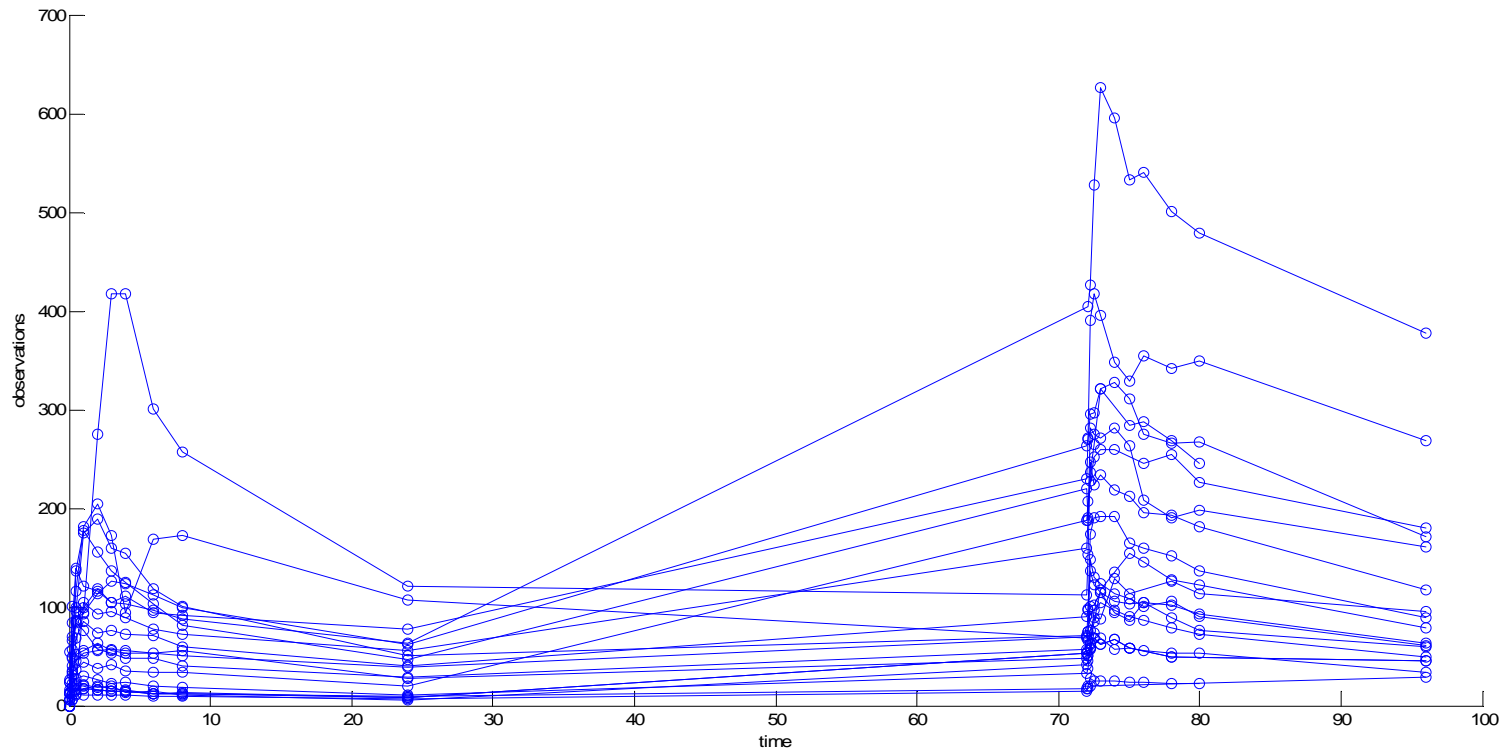

Supplement: NIHMS1040459-supplement-S1.pdf [file NIHMS1040459-supplement-S1.pdf]
