# Supplementary material
Source: PubMed Central journal article supplement (PMC6662598)

Figure S2

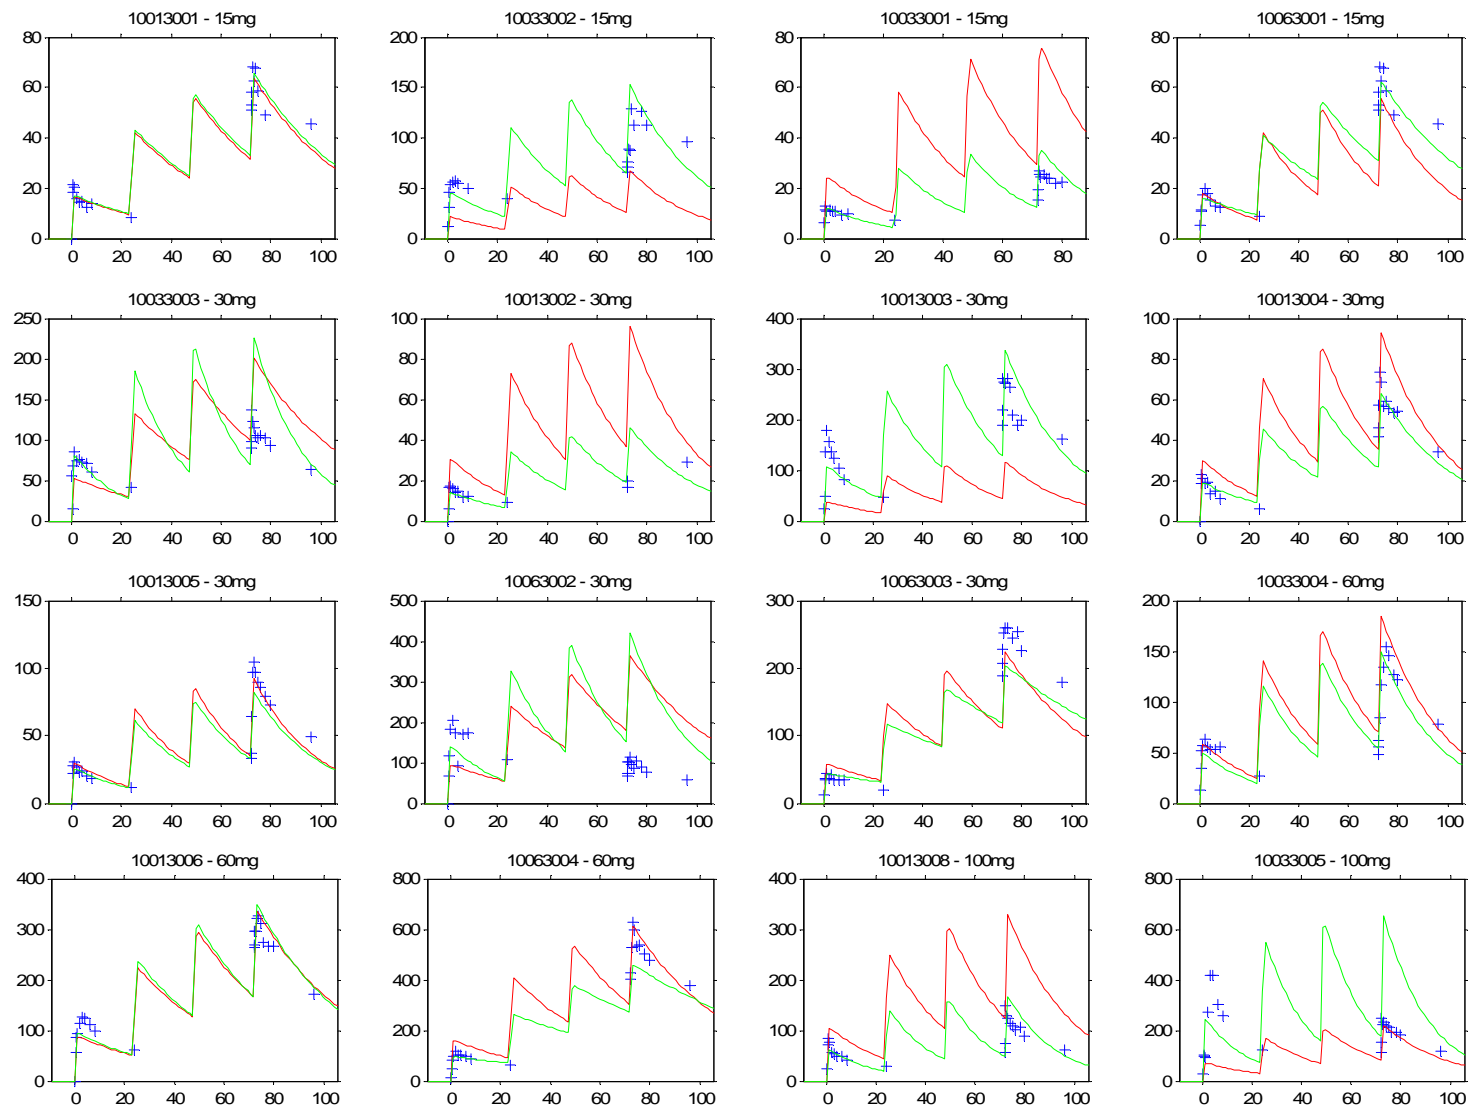

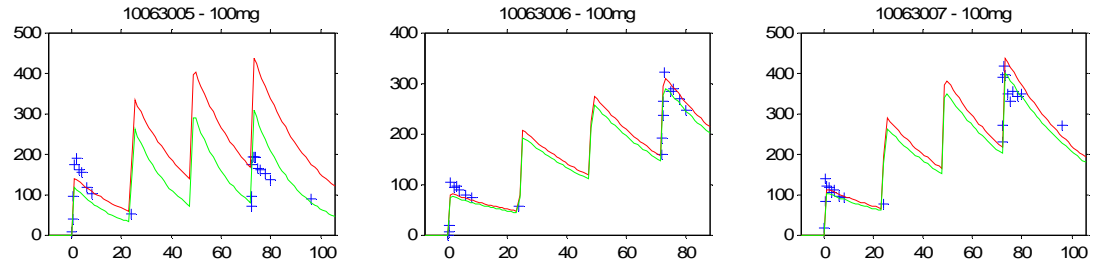

Supplement: NIHMS1040459-supplement-S2.pdf [file NIHMS1040459-supplement-S2.pdf]

Figure S3

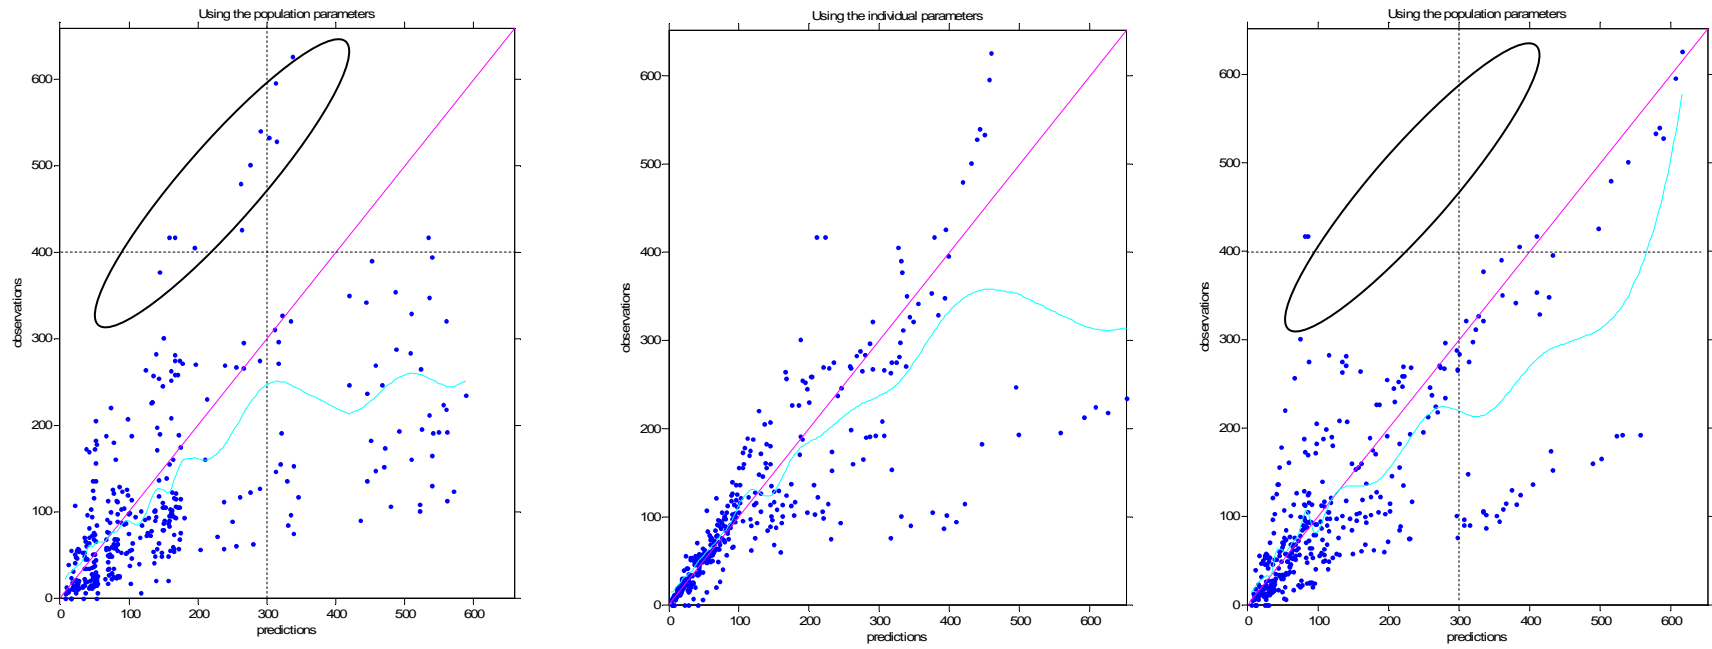

Supplement: NIHMS1040459-supplement-S3.pdf [file NIHMS1040459-supplement-S3.pdf]

Figure S4

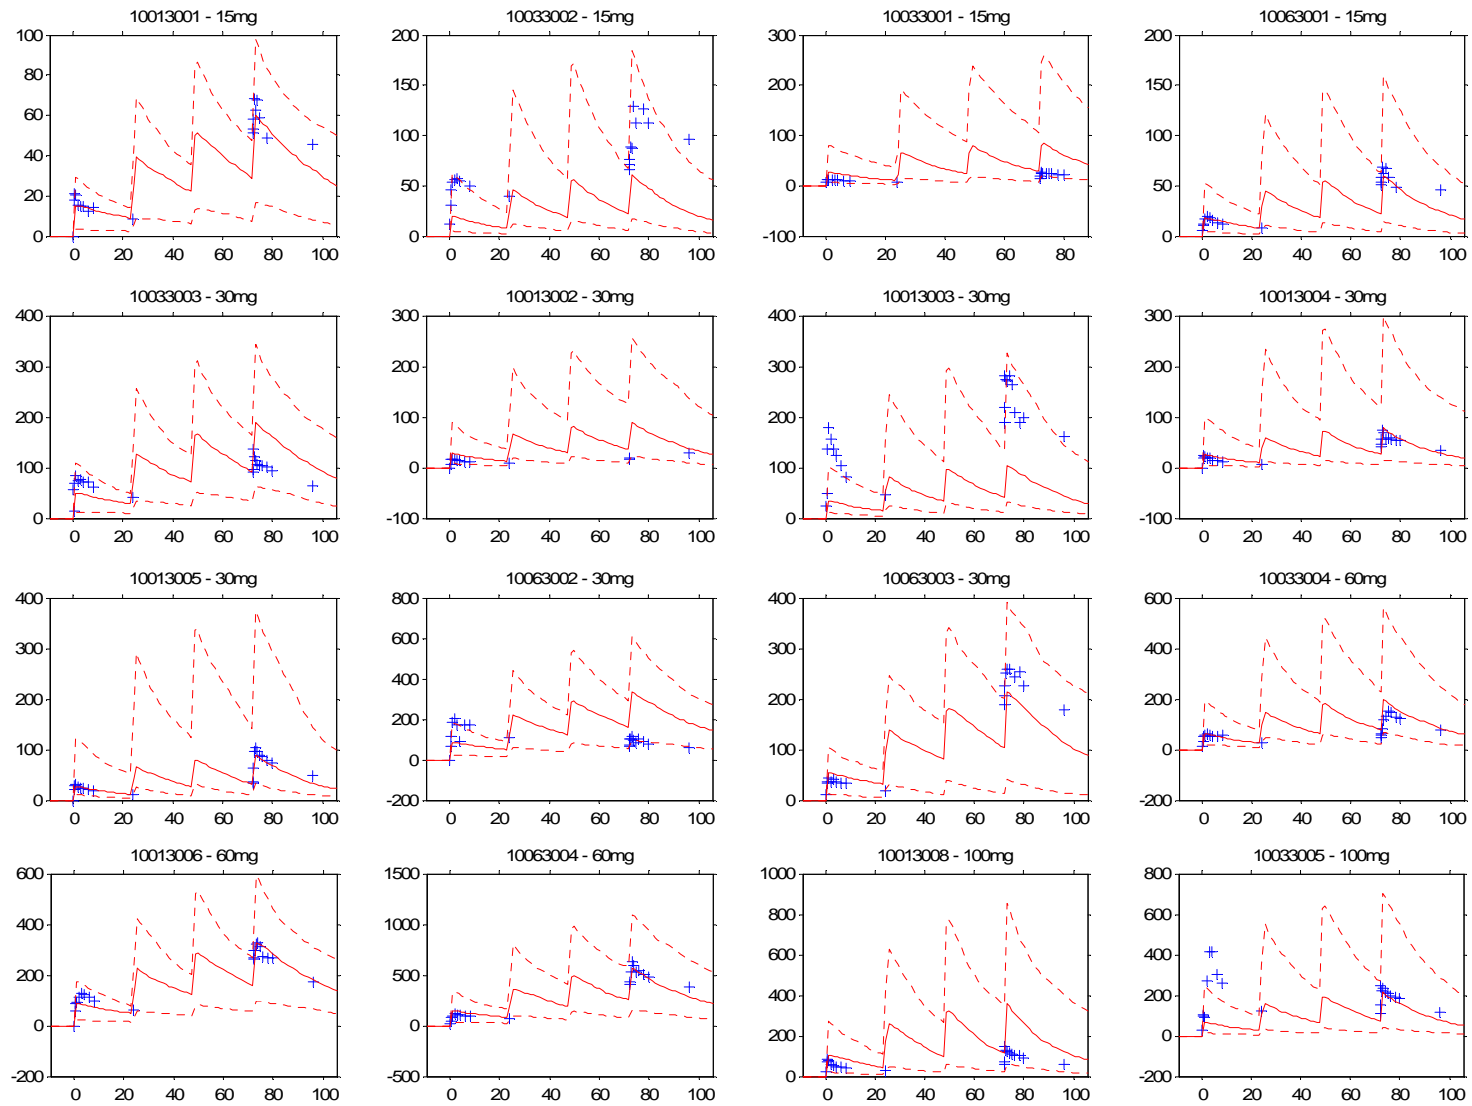

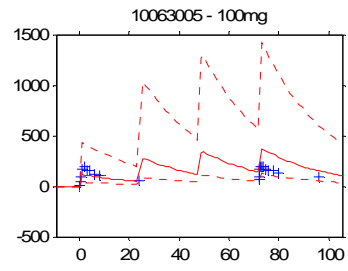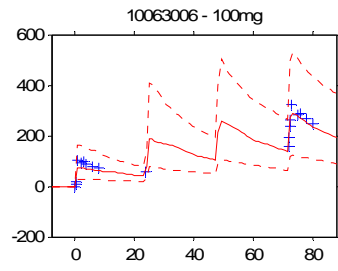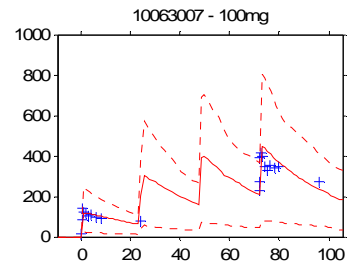

Supplement: NIHMS1040459-supplement-S4.pdf [file NIHMS1040459-supplement-S4.pdf]

Figure S5

(a):

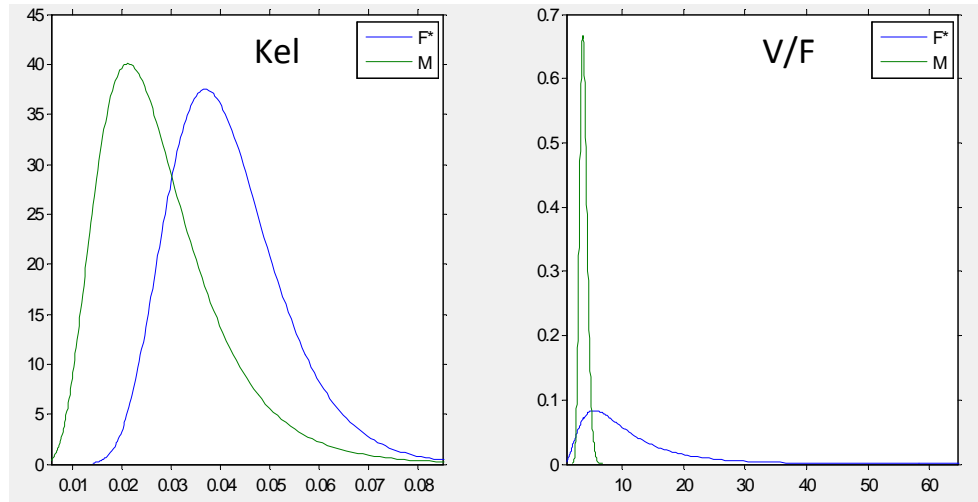

(b):

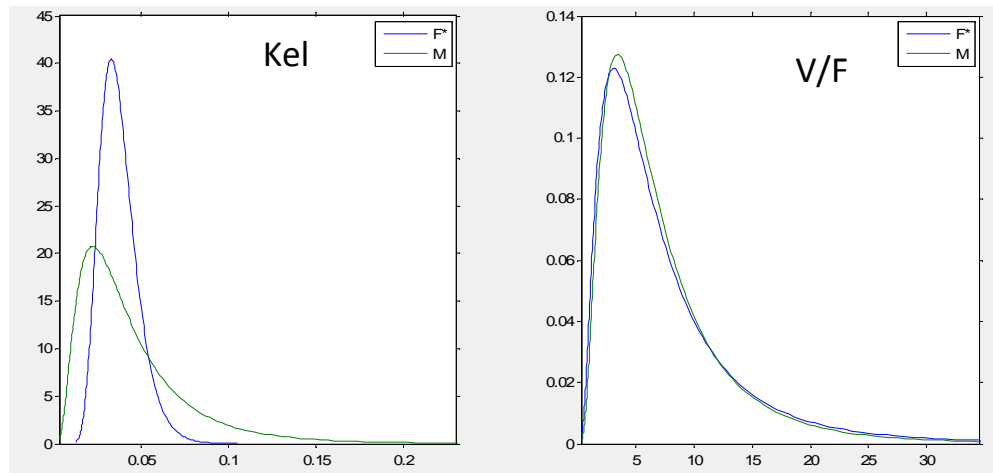

Supplement: NIHMS1040459-supplement-S5.pdf [file NIHMS1040459-supplement-S5.pdf]

Figure S6

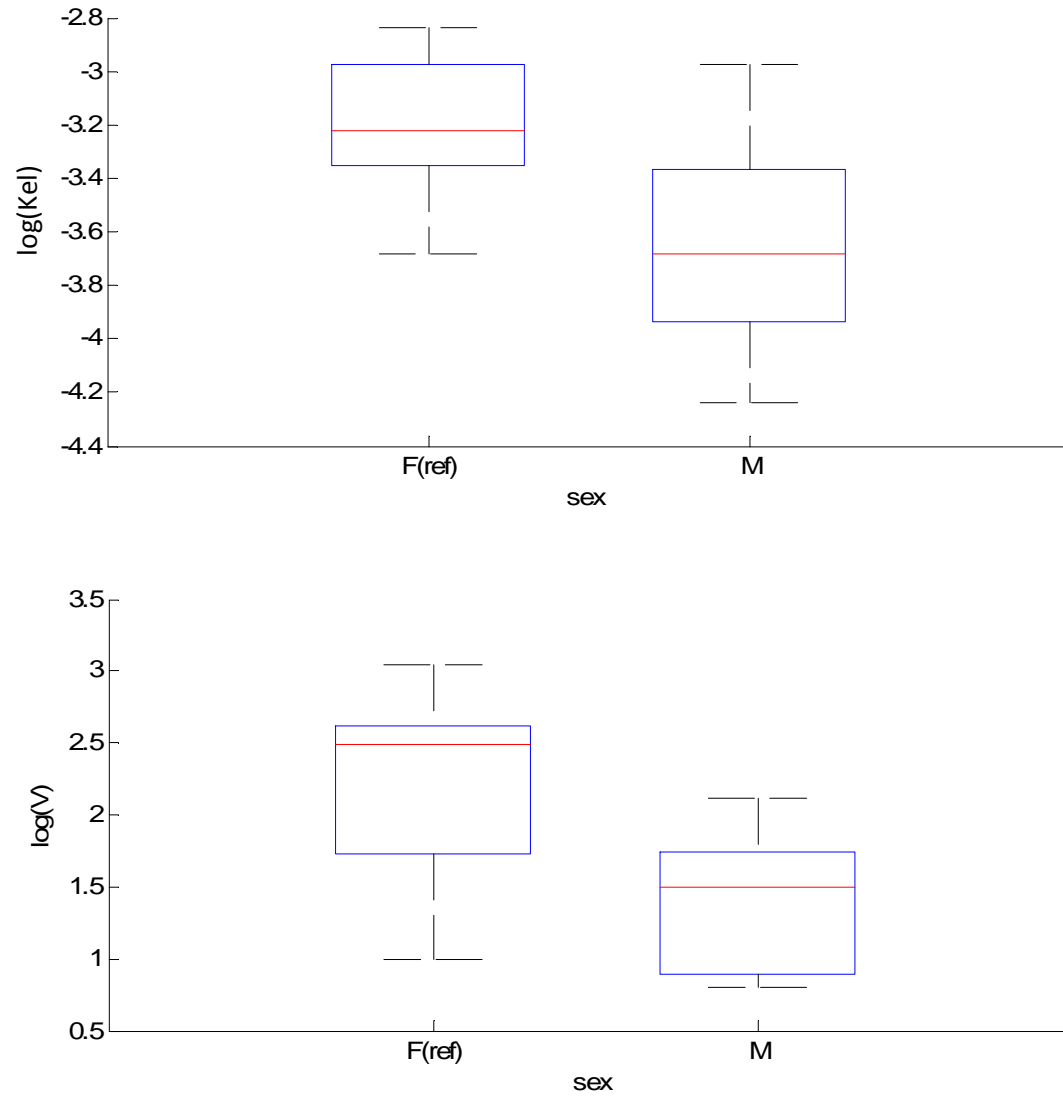

Supplement: NIHMS1040459-supplement-S6.pdf [file NIHMS1040459-supplement-S6.pdf]

Figure S7

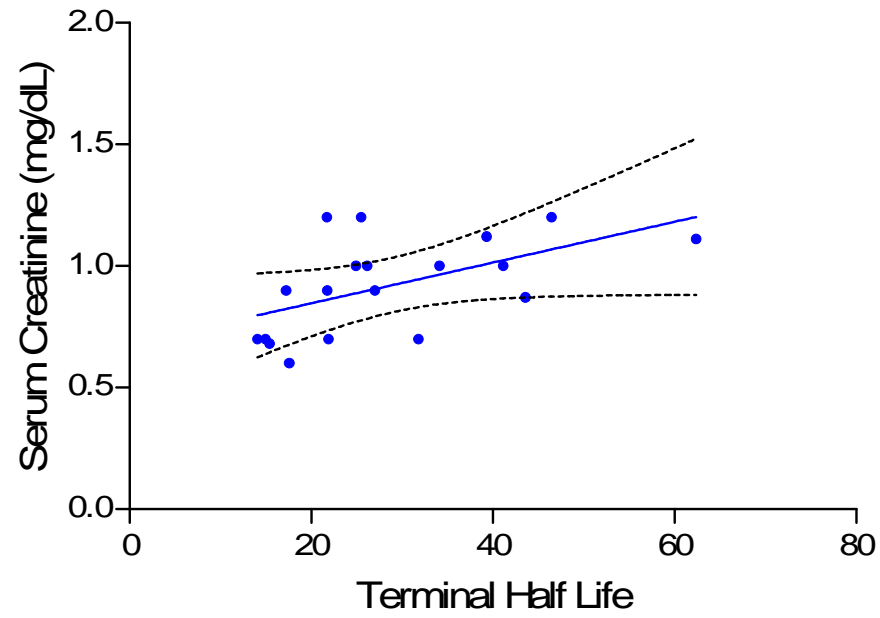

Supplement: NIHMS1040459-supplement-S7.pdf [file NIHMS1040459-supplement-S7.pdf]

Figure S8

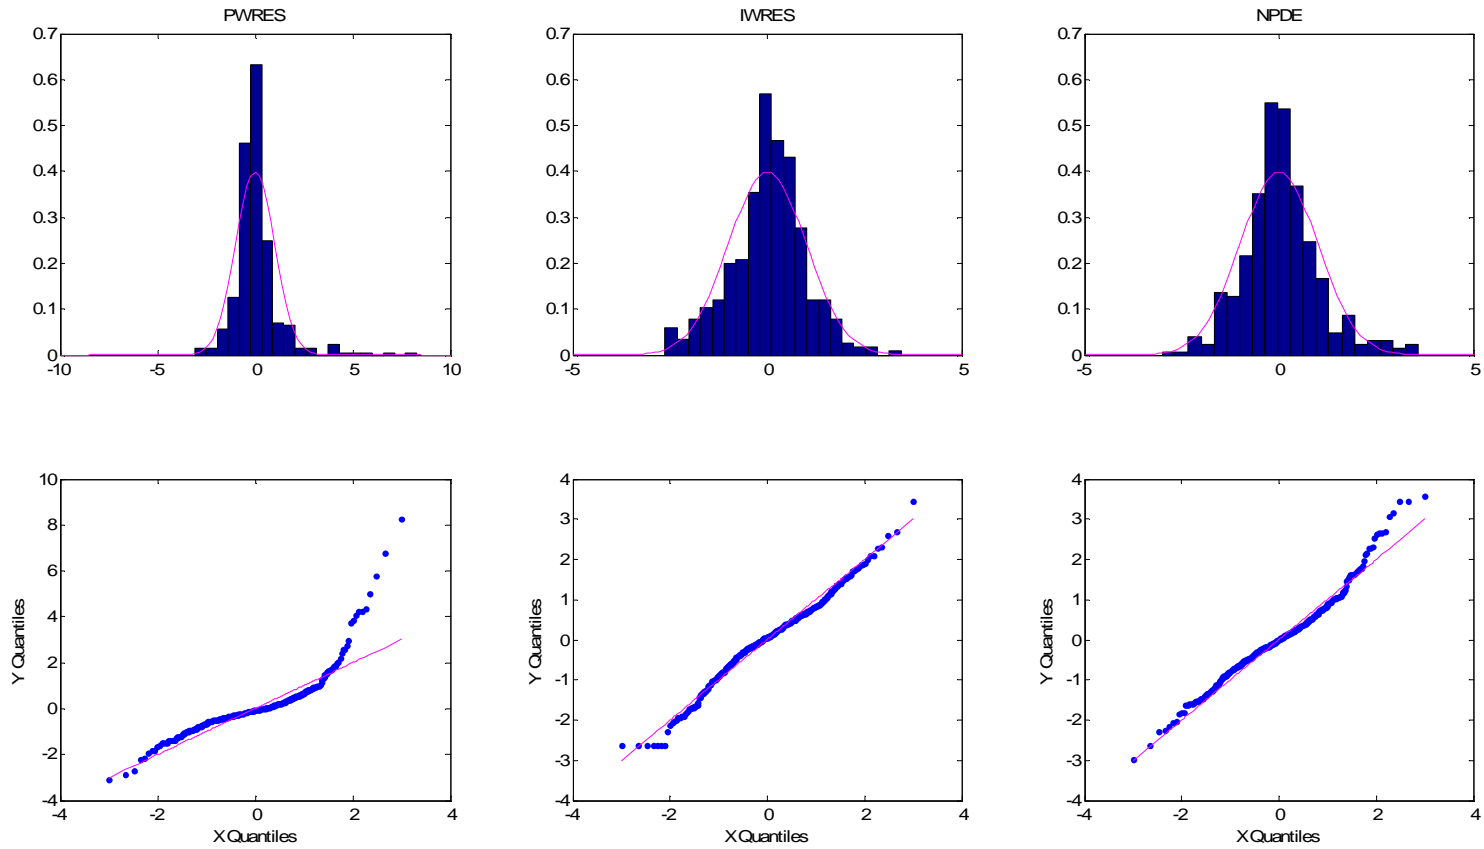

Supplement: NIHMS1040459-supplement-S8.pdf [file NIHMS1040459-supplement-S8.pdf]
